# Supplementary material for: On the Effectiveness of Bayesian AutoML methods for Physics Emulators
Source: Preprints.org preprint supplement (doi:10.20944/preprints202010.0595.v2), 2020-12-03
Supplement: Supplementary file 1 [file supplementary]

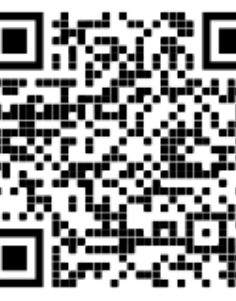

## Motivation

- Scientific data is often high-dimensional, complex, structured, sparse → Complicated loss manifold!
- Best practices in setting up network/hyperparameters translate poorly to scientific data
- Automatic ML methods are promising alternative to robustly train DNNs!

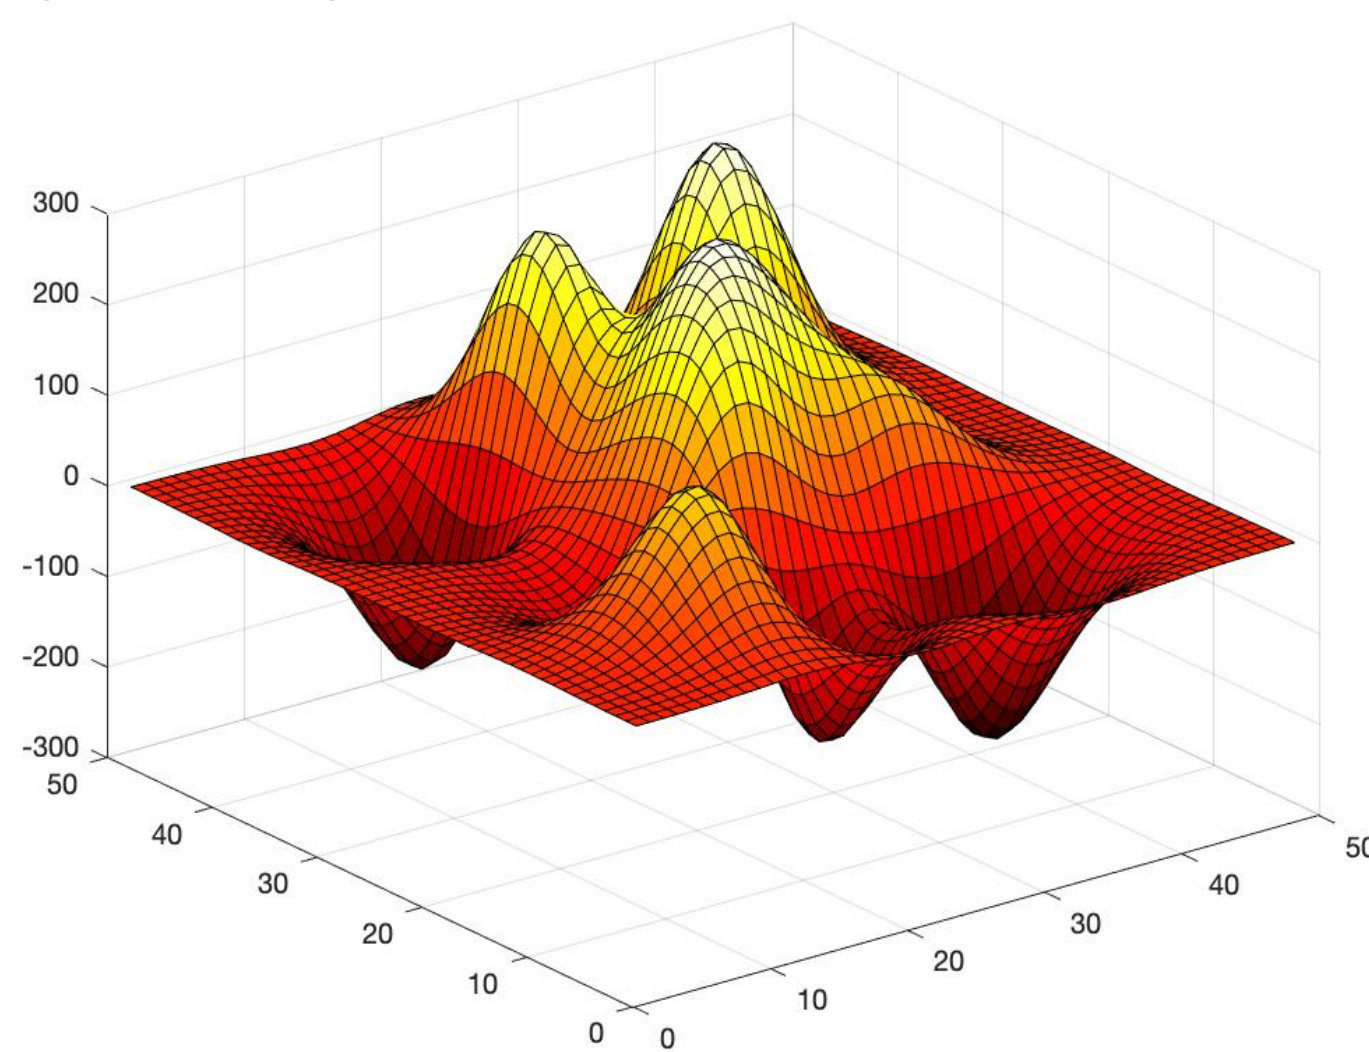

A translating, scaling Gaussian distribution-based loss manifold shows many peaks/troughs

## Workflow

- Bayesian Optimization based AutoML explores parameter space to identify best performing settings, starting with an initial guess
- BayesOpt modeled as Gaussian Process (GP) with Expected Improvement (EI) acquisition function

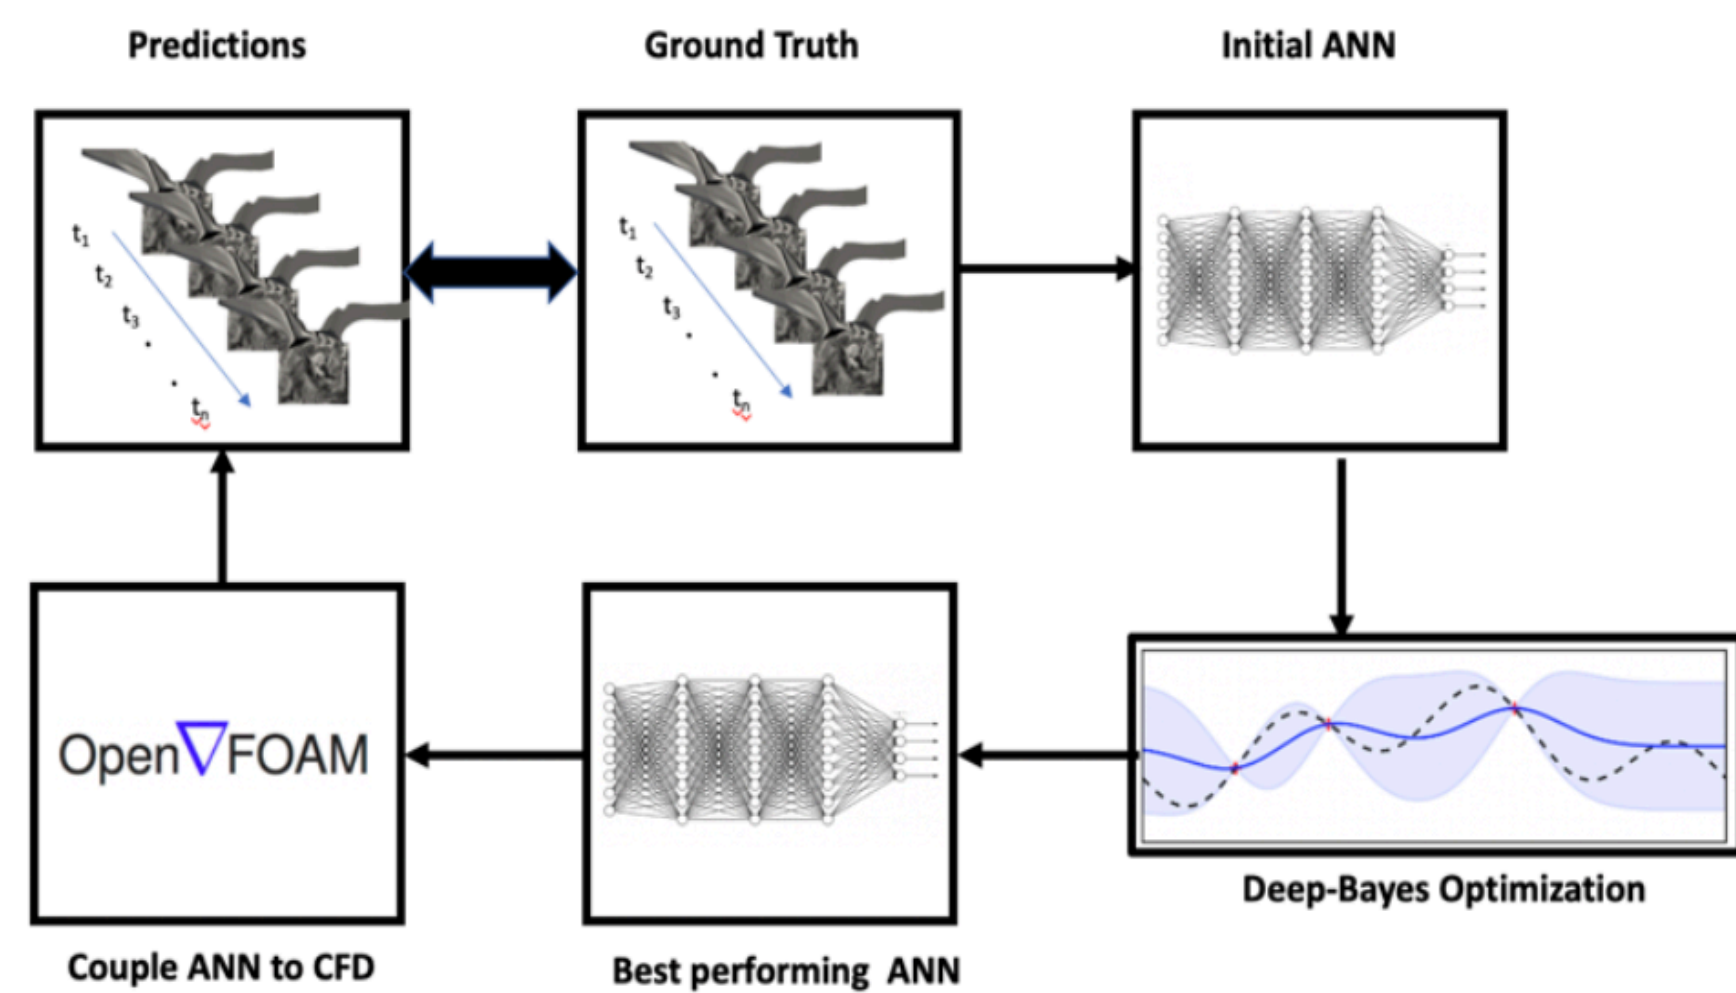

Workflow for AutoML for a physics emulation task. While the final goal of this work is to incorporate machine-learned model to non-linear PDE solver OpenFOAM, this study will limit to understanding the learning process

## Results

| Optimizer | Initialization | Batch Size | LR       | W  | D  | $\bar{\epsilon}$ | N     |
|-----------|----------------|------------|----------|----|----|------------------|-------|
| ADAM      | Glorot         | 1426       | 9.56e-04 | 91 | 10 | 1e-05            | 84904 |
| ADAM      | He             | 12719      | 3.77e-04 | 50 | 7  | 2e-04            | 18207 |
| SGDM      | Glorot         | 6814       | 0.0098   | 91 | 9  | 2e-03            | 75812 |
| SGDM      | He             | 1161       | 0.0098   | 89 | 6  | 1e-03            | 48778 |
| RMSProp   | Glorot         | 291        | 1e-04    | 78 | 4  | 8e-04            | 25432 |
| RMSProp   | He             | 11630      | 1.86e-05 | 55 | 9  | 1e-03            | 28004 |

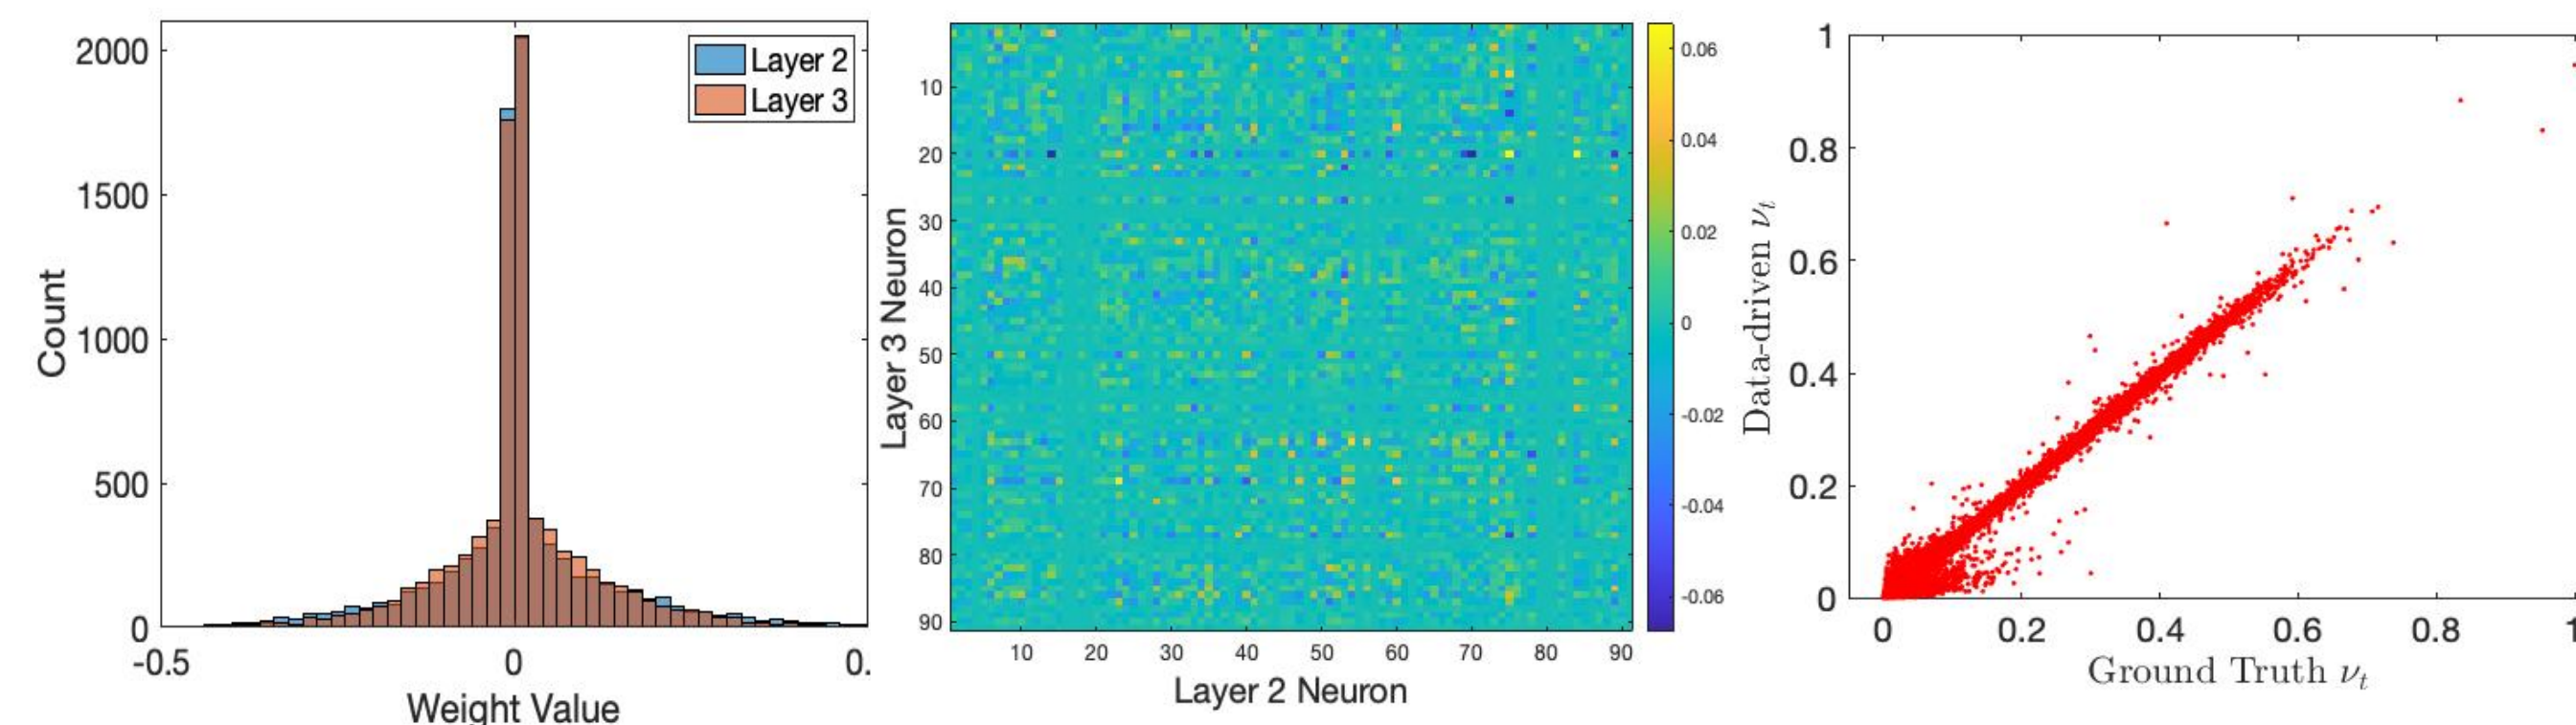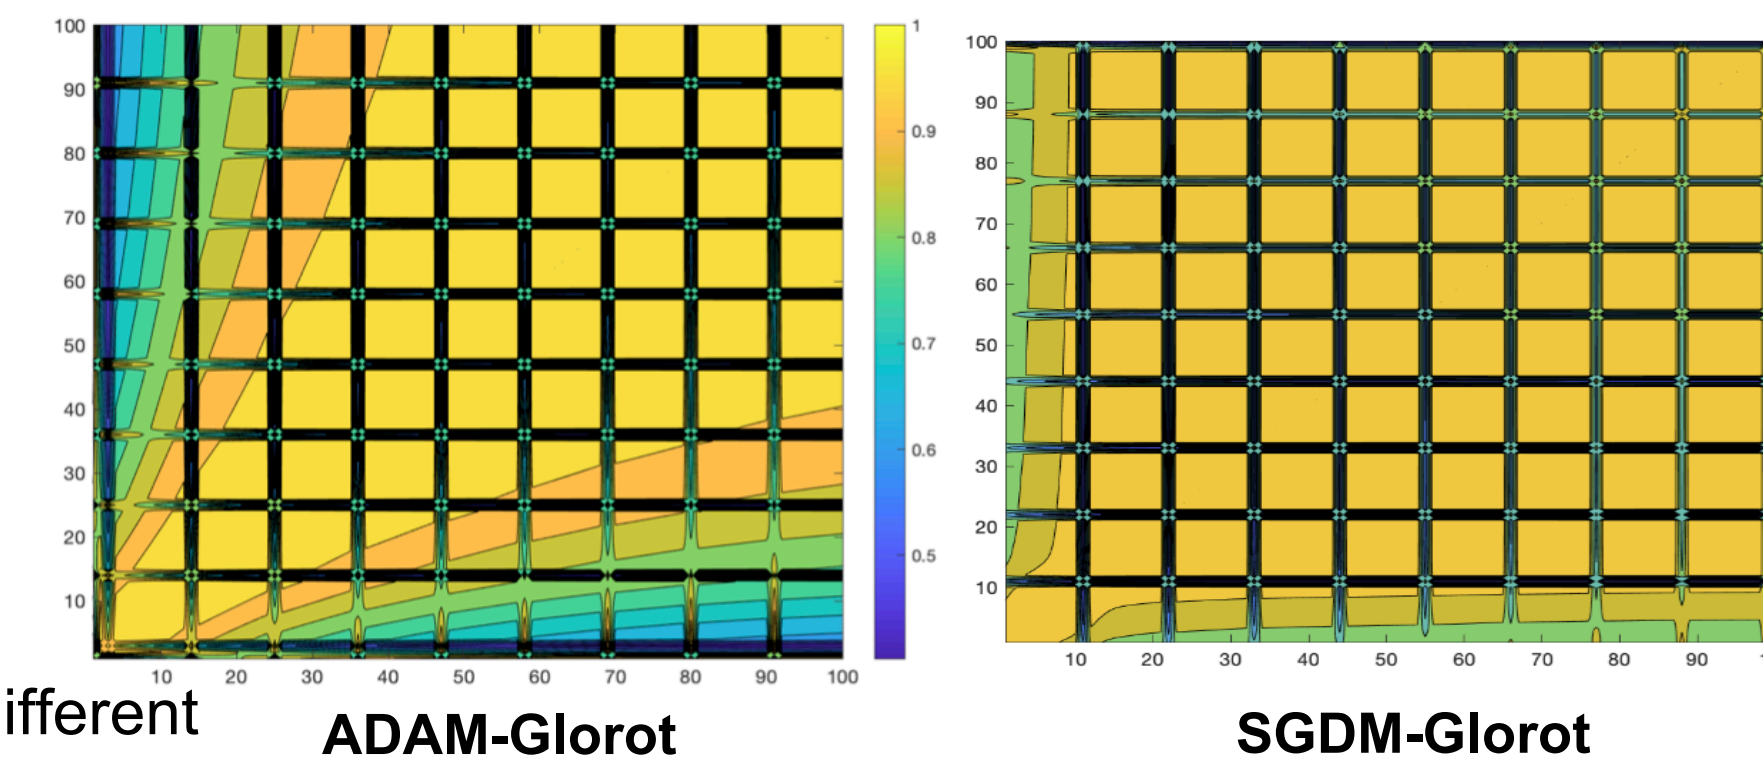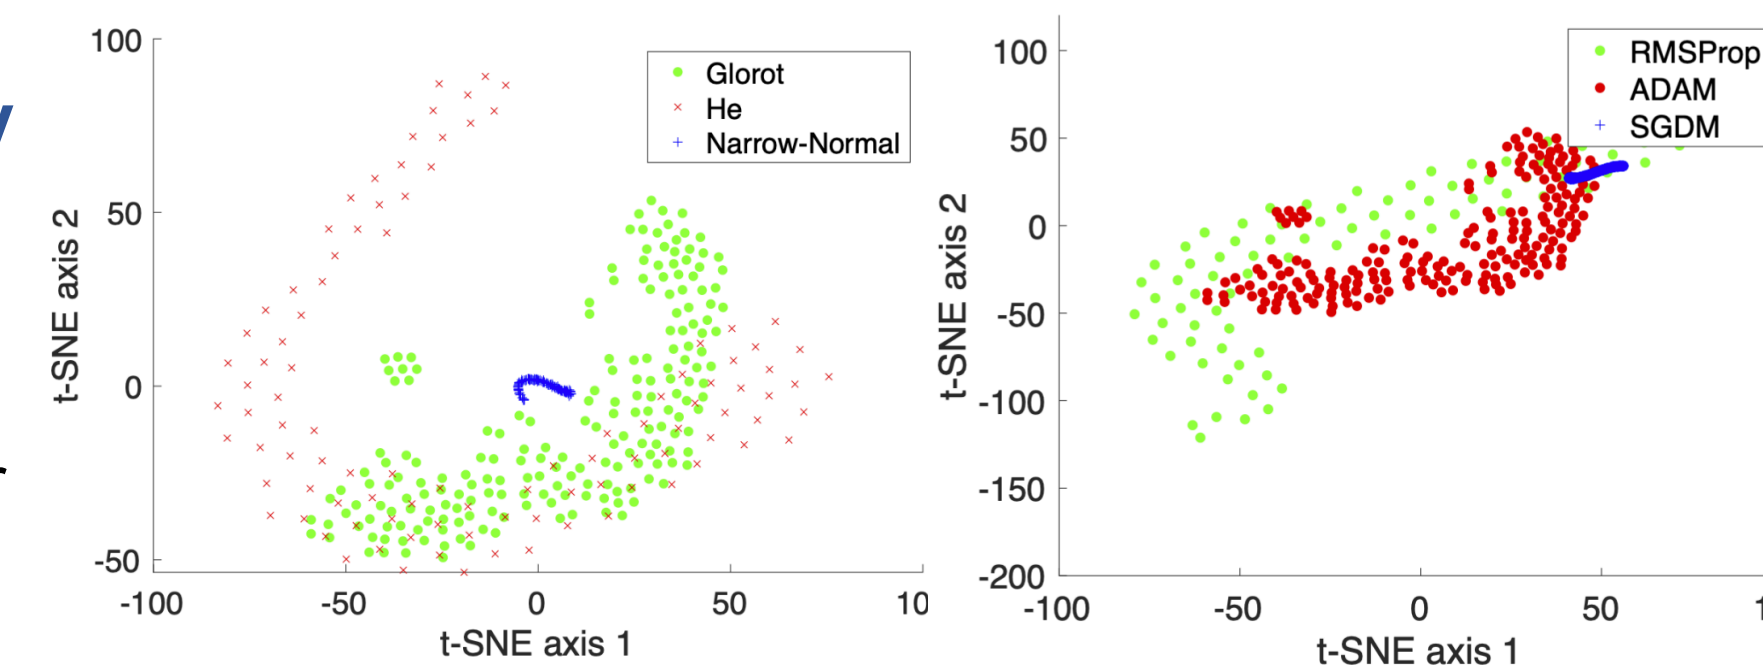

## TL;DR

- AutoML methods are successfully in robustly identifying best performing settings for a complicated physics problem
- Network training evolution is heavily dependent on choice of optimizers, adaptive LR optimizers outperform
- Layer-by-Layer learnt weight comparisons reveals complicated nature of network learning

## Physics

- Accurate turbulence closure is critically important for LES models
- Most methods involve some form of data-fitting, so why not a purely data-driven method!
- Eddy viscosity modeled as a function of large scale filtered variables

$$\nu_t = f(Re_c, S, \Omega, \nabla K, Y)$$

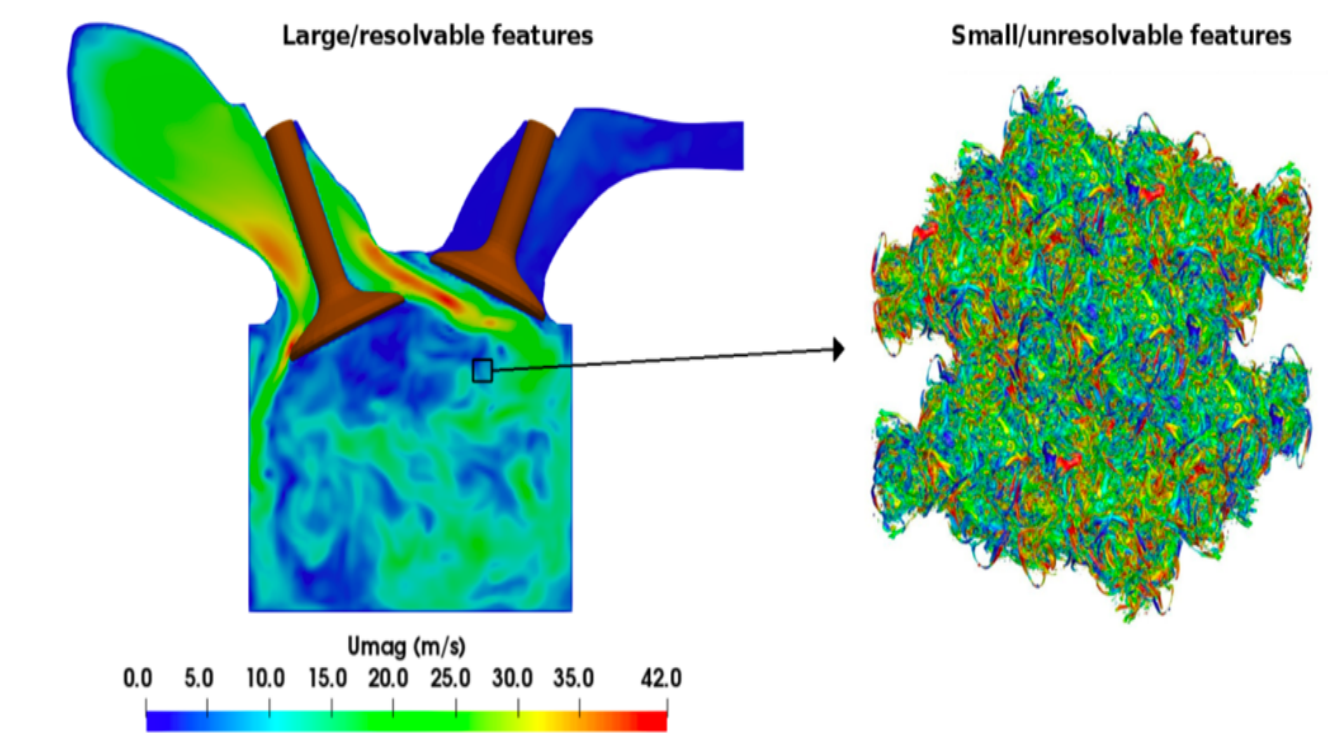

Multiscale nature of a typical Internal Combustion Engine (ICE) simulation. Adopted from Dias Ribeiro et al.

## Network Architecture Search

- NAS, Including optimize for weight initialization and solver

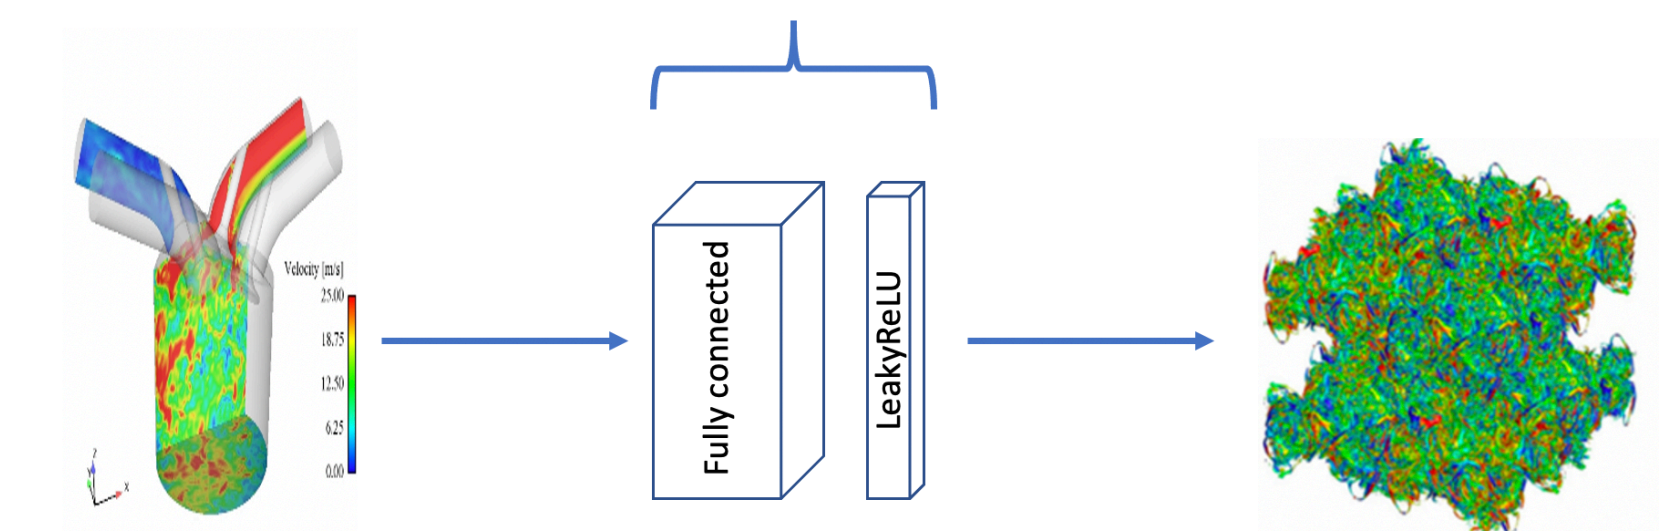

| Hyper-parameter | Min. Range | Max. Range | Interpolation |
|-----------------|------------|------------|---------------|
| Initial LR      | 1e-6       | 1e-2       | Logarithmic   |
| LR Drop Factor  | 10         | 1000       | Integer       |
| Batch Size      | 100        | 16000      | Logarithmic   |
| Network Depth   | 2          | 10         | Integer       |
| Network Width   | 10         | 100        | Integer       |

## References

Dias Ribeiro, Mateus, Alex Mendonça Bimbato, Mauricio Araújo Zanardi, José Antônio Perrella Balestieri, and David P. Schmidt. "Large-eddy simulation of the flow in a direct injection spark ignition engine using an open-source framework." *International Journal of Engine Research* (2020): 1468087420903622. Marge Simpson (2010).

## Acknowledgements
